1 *RNF213* variation, a broader role in neurovascular disease  
2 in Caucasian and Japanese populations

3 Oswaldo Lorenzo-Betancor<sup>1,2,3\*</sup>, Patrick R. Blackburn<sup>4,5</sup>, Luca Farrugia<sup>1,6</sup>, Alexandra I. Soto-  
4 Beasley<sup>1</sup>, Ronald L. Walton<sup>1</sup>, Emily Edwards<sup>6</sup>, Rabih G. Tawk<sup>7</sup>, Eric W. Klee<sup>4,5,8,9</sup>, William D.  
5 Freeman<sup>6</sup>, David Miller<sup>7,10</sup>, James Meschia<sup>6</sup> and Owen A. Ross<sup>1,11,12</sup>

6 <sup>1</sup>Department of Neuroscience, Mayo Clinic, Jacksonville, Florida, USA

7 <sup>2</sup>Veterans Affairs Puget Sound Health Care System, Seattle, Washington, USA

8 <sup>3</sup>Department of Neurology, University of Washington School of Medicine, Seattle, Washington, USA

9 <sup>4</sup>Center for Individualized Medicine, Mayo Clinic, Rochester, Minnesota, USA

10 <sup>5</sup>Department of Laboratory Medicine and Pathology, Mayo Clinic, Rochester, Minnesota, USA

11 <sup>6</sup>Department of Neurology, Mayo Clinic, Jacksonville, Florida, USA

12 <sup>7</sup>Department of Neurosurgery, Mayo Clinic, Jacksonville, Florida, USA

13 <sup>8</sup>Department of Health Sciences Research, Mayo Clinic, Rochester, Minnesota, USA

14 <sup>9</sup>Department of Clinical Genomics, Mayo Clinic, Rochester, Minnesota, USA

15 <sup>10</sup>Department of Radiology, Mayo Clinic, Jacksonville, Florida, USA

16 <sup>11</sup>Department of Clinical Genomics, Mayo Clinic, Jacksonville, Florida, USA

17 <sup>12</sup>Neuroscience PhD Program, Mayo Clinic Graduate School of Biomedical Sciences, Mayo Clinic,  
18 Jacksonville, Florida, USA

19

20 \*Corresponding author:

21 Oswaldo Lorenzo-Betancor, MD, PhD, Geriatric Research Education and Clinical Center S-182,  
22 VA Puget Sound Health Care System, 1660 South Columbian Way, Seattle, Washington, 98108,  
23 USA. E-mail: olorenzo@uw.edu.

24

25 Short running title: *RNF213* role in neurovascular diseases

26

27 Key words: *RNF213*, *SLC26A11*, Moyamoya disease, stroke, intracranial aneurysm

28

## 29 **Abstract**

30 Moyamoya disease (MMD) is a chronic, occlusive cerebrovascular disease that predominantly  
31 affects East Asian populations. The major genetic mutation associated with MMD in Asian  
32 populations is the p.R4810K substitution in Ring Finger Protein 213 (RNF213). Interestingly,  
33 variants in the *RNF213* gene have also been implicated in intracranial aneurysms (IA) in French-  
34 Canadian population, suggesting that variation in this gene may play a broader role in  
35 cerebrovascular phenotypes. In a recent genome-wide association study (GWAS) in a Caucasian  
36 population, variants rs6565653 and rs12601526 in the *Solute Carrier Family 26 Member 11*  
37 (*SLC26A11*) gene, which is less than 10kb away from *RNF213*, showed a suggestive association  
38 with young onset ischemic stroke. We propose that the signal could be tagging an association  
39 with common variation in the *RNF213* gene. We analyzed the linkage disequilibrium (LD)  
40 pattern in the *SLC26A11-RNF213* gene region and we observed a high LD between variants in  
41 this region based on D' values. We show that *SLC26A11* rs6565653 variant tags *RNF213*  
42 rs12944088, a missense variant that is more common among subjects with IA than in healthy  
43 individuals. Given the fact that rs6565653 tags several *RNF213* variants, it is highly likely that  
44 some of these tagged variants modify the risk of suffering stroke. The LD analyses suggest that  
45 the *SLC26A11* signal from the young onset ischemic stroke GWAS performed in a Caucasian  
46 population is also tagging variation at the *RNF213* loci, supporting the hypothesis that *RNF213*  
47 variation may result in a variety of neurovascular disorders including an increased risk and/or  
48 worse prognosis following ischemic stroke in Caucasian population.

49

50

51

## 52 **Introduction**

53 Moyamoya disease (MMD) is a chronic, occlusive cerebrovascular disease characterized by  
54 bilateral steno-occlusive changes that affect mainly the terminal portion of the internal carotid  
55 artery and the presence of abnormal vascular networks in the basal ganglia (Suzuki and Takaku  
56 1969). MMD is most common in East Asian populations and its incidence ranges from 0.35 to  
57 2.3 cases per 100,000 Japanese subjects (Wakai et al. 1997; Ahn et al. 2014) compared to 0.086  
58 cases per 100,000 people in the US population (Uchino et al. 2005). MMD can be divided into  
59 early onset and late onset forms with a biphasic peak pattern in incidence that occurs in the first  
60 and fourth decades of life (Ahn et al. 2014).

61 While the etiology of MMD remains unknown, up to 10-15% of cases are familial and are  
62 suggestive of an autosomal dominant pattern of inheritance with incomplete penetrance. A major  
63 genetic determinant associated with MMD in the Asian population is the p.R4810K mutation in  
64 the *Ring Finger Protein 213 (RNF213)* which is present in approximately 90% of all Japanese,  
65 79% of Korean and 23% of Chinese MMD patients (Liu et al. 2011). Interestingly, this mutation  
66 is also present in 2.3% of the East Asian healthy controls, which highlights the reduced  
67 penetrance of the mutation and suggests there are likely strong modifiers of disease (Liu et al.  
68 2011). It is also worth noting that the p.R4810K mutation has never been reported in the  
69 European/Caucasian population, in either MMD cases or controls, although other rare *RNF213*  
70 variants have been reported (Kobayashi et al. 2016).

71 The p.R4810K mutation has also been described to increase the risk of ischemic stroke  
72 attributable to large-artery atherosclerosis in East Asian population (Okazaki et al. 2019).  
73 Interestingly, in a genome-wide association study (GWAS) in young onset ischemic stroke  
74 performed in a Caucasian population (Cheng et al. 2016), two single nucleotide polymorphisms

75 (SNPs) in the *Solute Carrier Family 26 Member 11 (SLC26A11)* gene (rs6565653 and  
76 rs12601526), reached suggestive  $p$ -values of  $5.51 \times 10^{-7}$  and  $1.14 \times 10^{-6}$ , respectively (figure S1).  
77 Notably, the *SLC26A11* gene is less than 10kb away from the *RNF213* gene. Therefore, it is  
78 possible that the signal in the *SLC26A11* gene from this study may actually be tagging an  
79 association with common variation in the *RNF213* gene.

80 To examine this hypothesis we investigated the linkage disequilibrium (LD) patterns for  
81 common variation in the 17q25.3 chromosomal region that includes the *SLC26A11* and the  
82 *RNF213* genes in two ethnically different populations from the 1000 Genomes project.  
83 Additionally, we analyzed the expression changes in both genes according to their genetic  
84 variation in arterial tissues using the Genotype-Tissue Expression (GTEx) project data.

85

## 86 **Materials and methods**

### 87 ***RNF213* and *SLC26A11* variation analysis**

88 The linkage disequilibrium (LD) pattern between the *SLC26A11* and the *RNF213* gene SNPs was  
89 analyzed using common variants (minor allele frequency [MAF] > 0.01) located in both genes in  
90 two different publicly available populations: 99 unrelated Utah Residents with Northern and  
91 Western European ancestry (CEU population) and 104 unrelated Tokyo subjects with Japanese  
92 ancestry (JPT population) from the 1000 Genomes Project  
93 (<http://www.internationalgenome.org/>). In order to carry out the LD analyses between the  
94 *SLC26A11* and the *RNF213* genes, all variants located between chr17:78192200 and  
95 chr17:78374581 positions (build GRCh37) were extracted from the phase3 supporting genotype  
96 file from 1000 Genomes Project  
97 ([ftp://ftp.1000genomes.ebi.ac.uk/vol1/ftp/release/20130502/supporting/vcf\\_with\\_sample\\_level\\_a](ftp://ftp.1000genomes.ebi.ac.uk/vol1/ftp/release/20130502/supporting/vcf_with_sample_level_a)

98 [nnotation/](#)), and the CEU and JPT variants were filtered according to the European and East  
99 Asian MAFs, respectively. Proxy Single Nucleotide Polymorphisms (SNPs) were selected for  
100 both sets of variants with SNAP Proxy Search tool (<http://www.broadinstitute.org/mpg/snap/>)  
101 setting a minimum LD threshold of  $r^2 > 0.8$ . The CEU and the JPT + Han Chinese in Beijing  
102 (CHB) populations from the Hapmap 3 SNP dataset were used to analyze the CEU and JPT  
103 variants, respectively. The subset of tagging variants (92 CEU and 80 JPT SNPs, respectively,  
104 tables S1 and S2) was analyzed with the R LDHeatmap v.0.99-2 package  
105 (<http://stat.sfu.ca/statgen/research/ldheatmap.html>) to generate LD plots for this genomic region  
106 in both populations (figure 1). Additionally, the LDproxy tool from the LDlink online suite  
107 (<https://analysistools.nci.nih.gov/LDlink/?tab=home>) was used to search for proxy SNPs of  
108 rs6565653 and rs12601526 in the CEU and JPT populations (figures S2 and S3).

109

### 110 **SLC26A11 and RNF213 expression changes in arterial tissues**

111 Local expression quantitative trait loci (cis-eQTLs) and expression changes due to the SNPs  
112 driving these eQTLs were extracted from available vascular tissues (aorta, coronary and tibial  
113 arteries) from the Genotype-Tissue Expression project (GTEx) for *SLC26A11* and *RNF213* genes  
114 to determine whether there were any significant expression changes in these tissues. In order to  
115 analyze the cis-eQTLs for *SLC26A11* and *RNF213* genes, all SNPs included in an up and  
116 downstream flanking region of 25kb from both genes were extracted from the eQTL files from  
117 the three available vascular tissues (aorta, coronary artery and tibial artery) from the Genotype-  
118 Tissue Expression project (GTEx) Analysis V6p dataset  
119 (<http://www.gtexportal.org/home/datasets>). Several R packages were used to plot all variants  
120 with significant eQTL values assuming a false discovery rate (FDR) <5% (figure 2 and figures

121 S4 and S5). Additionally, all the mRNA expression variations associated to these eQTLs were  
122 also plotted for both genes (figure 2 and figures S4 and S5).

123

## 124 **Data availability**

125 Supplemental files available at FigShare. Figure S1 includes the genome-wide association results  
126 of early-onset ischemic stroke based on a transethnic meta-analysis and a European-only meta-  
127 analysis and the proximity of the two significant *SLC26A11* SNPs to the *RNF213* gene. Figure  
128 S2 and S3 show  $R^2$  and  $D'$  values for proxy SNPs for rs6565653 and rs12601526 *SLC26A11*  
129 variants in CEU and JPT populations, respectively. Figure S4 shows significant local expression  
130 quantitative trait loci (cis-eQTL) values for *SLC26A11* and *RNF213* SNPs, affecting arterial  
131 tissues. Figure S5 shows expression changes in *SLC26A11* and *RNF213* due to SNP effects in  
132 arterial tissues. Tables S1 and S2 show chromosome, position and allele frequencies for SNPs  
133 used in the LD analyses in CEU and JPT populations, respectively. File S1 includes the R code  
134 that was used to generate the results of the current analysis and to plot all the figures from the  
135 manuscript itself as well as from the supplementary materials.

136

## 137 **Results**

### 138 **LD patterns in CEU and JPT populations**

139 S1 and S2 Tables show the allele frequencies for the SNPs used in the LD analyses in CEU and  
140 JPT populations, respectively. The differences between allele frequencies across SNPs for this  
141 region explain the apparent low LD between *SLC26A11* and *RNF213* variants in both  
142 populations according to  $r^2$  values (figures 1A and 1C). However, if we measure the  $D'$  values,  
143 which do not take into account allele frequencies, for the same variants in both populations we

144 can see that the LD between variants in *SLC26A11* and *RNF213* is greater than expected (figures  
145 1B and 1D). The lack of genotypes for *RNF213* p.R4810K variant in both populations makes it  
146 difficult to establish the potential LD of variants in *SLC26A11* with this specific mutation (figure  
147 1 and figures S2 and S3). However, in CEU population, rs6565653 reaches D' scores of 0.99  
148 with the missense *RNF213* rs12944088 (p.H4691R) variant and even 1.0 with intronic *RNF213*  
149 rs4890018 and rs9898470 SNPs. These three SNPs are located in the vicinity of the pathogenic  
150 p.R4810K *RNF213* mutation (figure 1). Additionally, in the JPT population there is a missense  
151 variant in the *RNF213* gene (rs142798005, MAF = 0.0096; figure S3) with a D' value of 1 for  
152 both *SLC26A11* SNPs (rs6565653, MAF = 0.024; rs12601526, MAF = 0.0288). However, due to  
153 the different MAFs of the three SNPs, the  $r^2$  values reach only 0.3942 and 0.3269 scores when  
154 evaluating rs142798005 as a proxy SNP of rs6565653 and rs12601526, respectively.

155

### 156 ***SLC26A11* and *RNF213* mRNA expression patterns in arterial tissues**

157 Given the fact that rs6565653 tags multiple *RNF213* variants, including the missense p.H4691R  
158 change, we cannot rule out that *SLC26A11* variants are tagging *RNF213* variants that modify  
159 expression. From the analysis of the eQTL results, it is evident that variation in both *SLC26A11*  
160 and *RNF213* genes affects their respective expression. It is interesting though that the eQTLs and  
161 the expression variation is greater in the tibial artery than in the aorta or in the coronary arteries  
162 (figures S4 and S5). Of note, while most of the variation in the *SLC26A11* gene, including  
163 rs6565653 and rs12601526, tends to downregulate its expression, the variation in the *RNF213*  
164 gene, shows a trend towards its overexpression, suggesting a possible toxic gain-of-function for  
165 *RNF213* mutations (figure 2 and figures S4 and S5).

166

## 167 **Discussion**

168 In this paper we analyzed the *SLC26A11* and *RNF213* LD patterns in CEU and JPT populations  
169 in order to assess whether *SLC26A11* variation could be tagging *RNF213* variants and thus  
170 would implicate *RNF213* as a potential disease gene in ischemic stroke. We have shown, in CEU  
171 population, that *SLC26A11* rs6565653 tags the *RNF213* rs12944088 (p.H4691R) variant.  
172 Interestingly, this variant has a MAF of 0.0159 in Caucasian population and was found to be  
173 more frequent among subjects with IA (0.0365) than in healthy controls (0.0163) in the French-  
174 Canadian IA study (Zhou et al. 2016). However, this result was not observed in the JPT  
175 population, because most of the variation in the *RNF213* gene seems to be specific to a given  
176 ethnic background. In fact, figure S3 shows a paucity of SNPs with high  $r^2$  scores in *SLC26A11*  
177 and *RNF213* genes region in the JPT population, suggesting that the SNPs in this region have  
178 highly variable MAFs and many of them are rare variants specific to the JPT population.

179 Evidence from several recent studies suggests that *RNF213* is a susceptibility gene for a  
180 number of different neurovascular conditions including ischemic and hemorrhagic stroke.  
181 Miyawaki et al. also showed an increased risk of intracranial major artery stenosis / occlusion  
182 (ICASO) in a selected Japanese population who carry the *RNF213* p.R4810K mutation  
183 (Miyawaki et al. 2013). Similarly, Bang et al. found that *RNF213* p.R4810K is associated with  
184 an increased risk of intracranial atherosclerotic stenosis (ICAS) in East Asians. Furthermore, this  
185 study found that ICAS patients with the common *RNF213* variant were younger than those  
186 without the variant and hypothesized that this variant could lead to vascular fragility in a subset  
187 of patients, resulting in ischemic and hemorrhagic neurovascular presentations (Bang et al.  
188 2016). Studies performed in the French-Canadian population suggest that variation in *RNF213* is  
189 also a risk factor for developing intracranial aneurysms (IA) (Zhou et al. 2016).



190 Recently, a multiancestry association study that included 520,000 subjects identified 32  
191 genome-wide significant loci, 22 of which were novel, associated with stroke (Malik et al. 2018).  
192 However, *RNF213* gene was not one of these novel hits. There are several reasons that can  
193 explain the absence of the signal in the multiancestry study. One of them is that the effect of rare  
194 *RNF213* mutations, including the p.R4810K variant, is ethnic specific affecting predominantly  
195 East Asian population and the number of cases and controls in the multiancestry study for each  
196 population is not proportional. In this paper, we showed that *RNF213* variation is different  
197 between CEU and JPT populations. In fact, p.R4810K has never been described in European  
198 samples and missense variants in this gene are rare among Caucasian population and different  
199 from the ones that have been described in Asian populations. To be more specific, the  
200 multiancestry genome-wide association study included 17 European studies accounting for  
201 40,585 cases and 406,111 controls, two East Asian studies that included 17,369 cases and 28,195  
202 controls and 3 South Asian studies that included 2,437 cases and 6,707 controls. In total there are  
203 40,585 European cases and 406,111 European controls against the 19,806 Asian cases and  
204 34,902 Asian controls. Therefore, the European population size could be hiding the *RNF213*  
205 variation effect.

206 The original *SLCA26A11* GWAS signal was found in a European early onset ischemic  
207 stroke cohort (Cheng et al. 2016). A study performed in 2018 in 70 Japanese patients (20-60  
208 years of age) with intracranial arterial stenosis suffering non-cardioembolic or transient ischemic  
209 stroke but without moyamoya disease, examined the prevalence of the *RNF213* p.R4810K  
210 variant and identified this variant in 17 out of 70 patients (24.3%) (Kamimura et al. 2019).  
211 Additionally, the *RNF213* p.R4810K variant was found in 35% of patients with stenosis in the  
212 M1 segment of the middle cerebral artery or the A1 segment of the anterior cerebral artery but in

213 only one patient (9%) with intracranial posterior circulation stenosis. It is possible that the  
214 European *SLCA26A11* GWAS signal and that the *RNF213* p.R4810K variant contribute mainly  
215 to early onset ischemic stroke. As a result, the signal may not reach significance in the  
216 multiancestry GWAS because the population of the later study either did not include enough  
217 early onset stroke cases, as the purpose of this GWAS was not to assess risk variants for this  
218 specific phenotype.

219 Interestingly, a meta-analysis of 22 migraine GWA studies, including 59,674 patients and  
220 316,078 controls identified 16 SNPs in the *RNF213* locus, two of which were missense  
221 mutations, that were associated with the disease (Gormley et al. 2016). The underlying  
222 mechanisms of migraine are poorly understood. However, the neurovascular theory holds that a  
223 complex series of neural and vascular events initiates migraine (May and Goadsby 1999). These  
224 facts suggest that variants in the *RNF213* could contribute to the development of several  
225 neurovascular diseases.

226 *RNF213* is an E3 ubiquitin-protein ligase with two AAA+ ATPase domains, which are  
227 characteristic of energy-dependent unfoldases (Koizumi et al. 2016). It has been shown that  
228 *RNF213* is involved in angiogenesis by promoting vessel regression (Scholz et al. 2016). Hitomi  
229 et al. showed that the angiogenic activities of iPSC-derived vascular endothelial cells (iPSECs)  
230 from MMD patients and carriers were lower than in subjects who did not carry the *RNF213*  
231 p.R4810K allele. Furthermore, they showed that overexpression of *RNF213* p.R4810K inhibited  
232 angiogenic activity and proliferation of human umbilical vein endothelial cells (HUVECs) while  
233 overexpression of normal *RNF213* did not (Hitomi et al. 2013). The underlying pathogenic  
234 mechanism of *RNF213* in vascular disease (whether loss- or toxic gain-of-function) remains

235 unclear, a number of *in vivo* knockdown or overexpression models have demonstrated  
236 conflicting results on vasculature (Liu et al. 2011) (Sonobe et al. 2014).

237 Both *SLCA26A11* and *RNF213* could be involved in neurovascular disorders. *SLCA26A11*  
238 may act in the neuron-environment homeostasis after an acute ischemic event by worsening the  
239 cytotoxic edema around the original lesion. *SLC26A11* is a member of the solute linked carrier  
240 26 family of sulfate/anion exchangers. After an acute injury, such as an ischemic stroke, the  
241 depolarized neuronal membranes drive an influx of  $\text{Na}^+$  within the cell. Membrane  
242 depolarization also activates the voltage-gated *SLC26A11* chloride channel, which leads to  $\text{Cl}^-$   
243 accumulation within the cells (Rungta et al. 2015). The increase of cytoplasmic  $\text{NaCl}$  generates  
244 an osmotic imbalance that leads to water influx, which causes a cytotoxic edema with neuronal  
245 swelling and subsequent cell death (Rungta et al. 2015). Lower *SLC26A11* expression in  
246 vascular tissues secondary to most of its genetic variation could be interpreted as a potential  
247 source of dysregulation of intracellular chloride transport.

248 However, *SLC26A11* rs6565653 tags multiple *RNF213* variants and suggests that the young  
249 onset ischemic stroke GWAS signal could be tagging *RNF213* gene variation. This would further  
250 support the role of *RNF213* in the development of multiple neurovascular disorders, including  
251 MMD, IA and migraine and an increased risk and/or worse prognosis of an ischemic stroke in a  
252 population specific manner. In any case, additional studies, including expression analyses in  
253 vascular tissues from patients with neurovascular disorders, are warranted to further study the  
254 role of both genes in the pathophysiology of neurovascular disorders.

255

## 256 **Acknowledgments**

257           The authors thank the patients and families who donated DNA samples for this work. This  
258 study was supported by the Mayo Foundation for Medical Education and Research, benefactors  
259 Randall S. and Friedgard D. Acree, James and Esther King Foundation, New Investigator Award  
260 from the Department of Health, the American Heart Association, the Mayo Clinic Office of  
261 Health Disparities Research, the Myron and Jane Hanley Award for Stroke Research and the Joe  
262 Niekro Foundation.

263

264

265

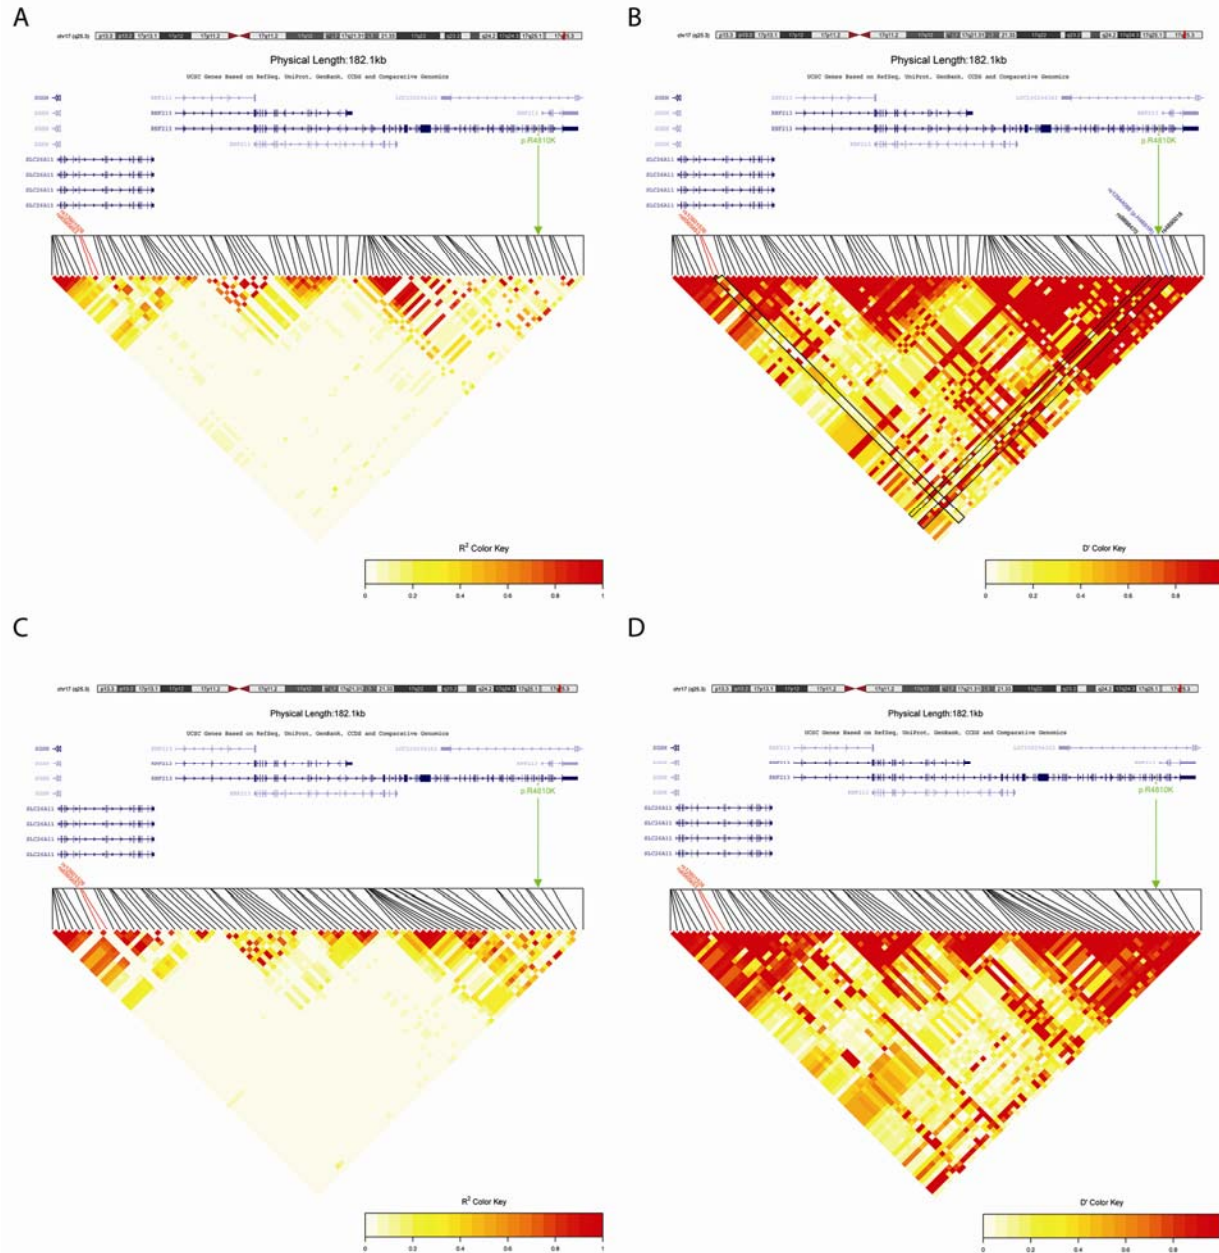

266

267 **Figure 1.** Pairwise LD for common tagging SNPs located in the *SLC26A11* and *RNF213* genes  
268 in CEU and JPT populations. (A)  $R^2$  values in CEU population; (B)  $D'$  values in CEU  
269 population; (C)  $R^2$  values in JPT population; (D)  $D'$  values in JPT population. The two SNPs that  
270 were associated with young onset ischemic stroke in Caucasian population located in *SLC26A11*  
271 gene are highlighted in red. The Moyamoya disease p.R4810K mutation located in *RNF213* exon  
272 60 is highlighted in green. The missense p.H4691R variant in LD with rs6565653 is highlighted

273 in blue. Black polygons in (B) highlight D' LD scores between rs6565653, rs12601526 and the  
274 SNPs around the RNF213 p.R4810K mutation. LD plot was generated with R LDheatmap  
275 package.

276

277

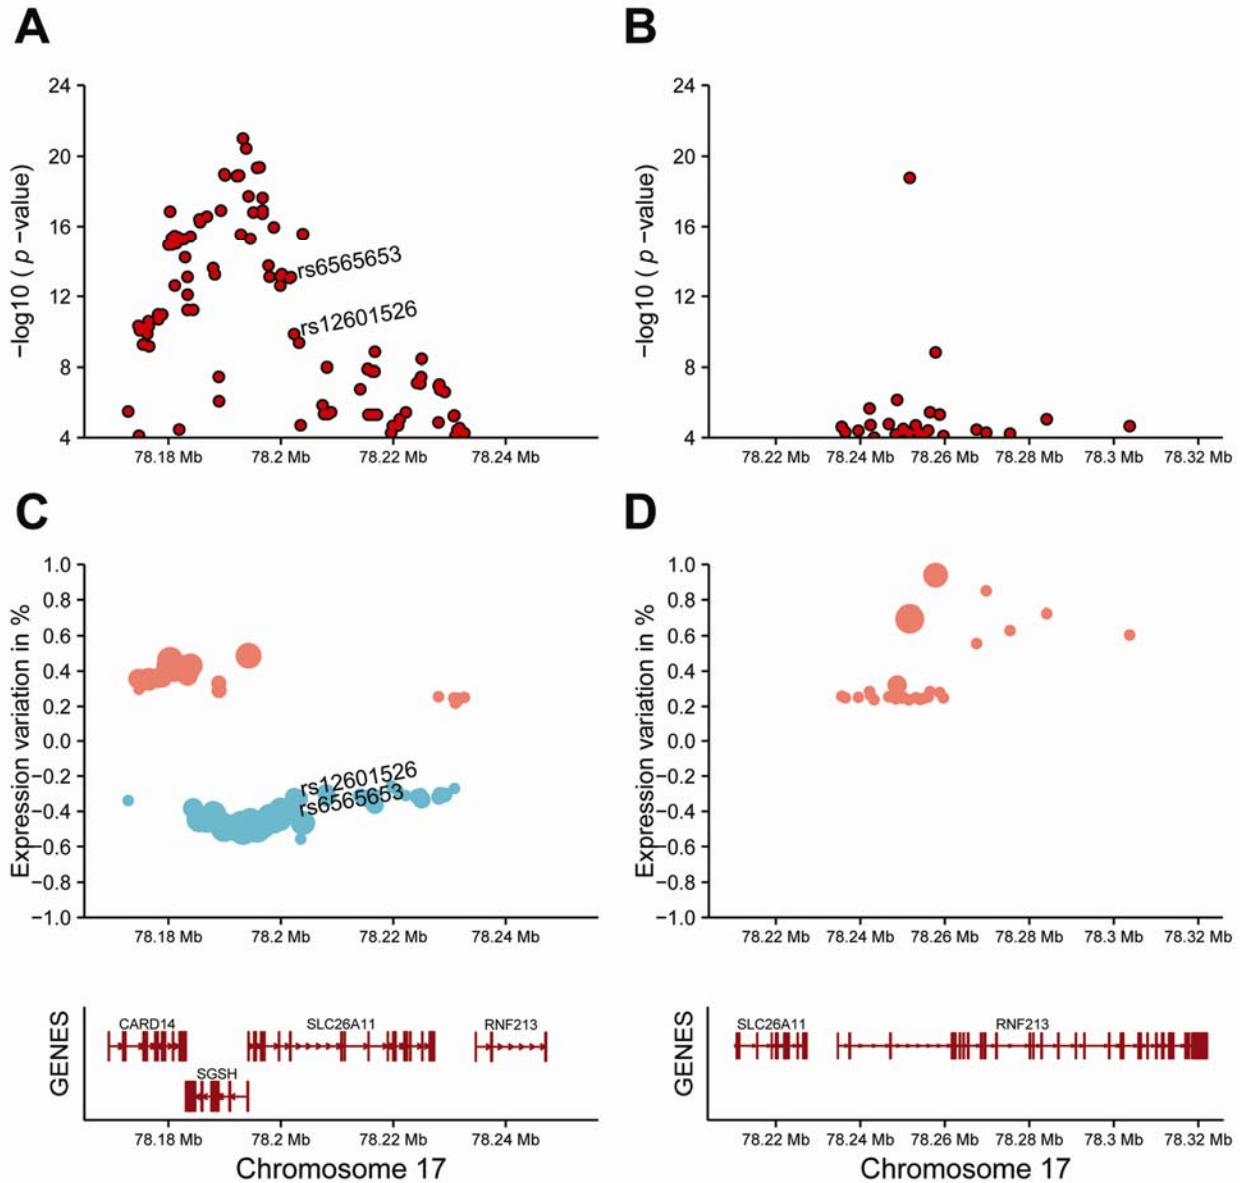

278

279 **Figure 2. Plots showing eQTL values and expression data of *SLC26A11* and *RNF213* genes**

280 **in tibial artery tissue.** Significant local expression quantitative trait loci (cis-eQTL) values for

281 *SLC26A11* (A) and *RNF213* (B) SNPs, respectively. Red dots in A and B are significant cis-

282 eQTLs (at false discovery rate <5%) for *SLC26A11* and *RNF213* genes in tibial artery tissue.

283 Protein expression changes for *SLC26A11* (C) and *RNF213* (D) mRNA due to SNPs effect in

284 tibial artery. In C and D, red dots represent overexpression and blue dots underexpression,

285 respectively. The size of each dot represents the  $-\log_{10}(p\text{-value})$  between the SNP and the

286 expression change. Figures elaborated using GTEx data. *CARD14* = Caspase Recruitment  
287 Domain Family Member 14; *SGSH* = N-Sulfoglucosamine Sulfohydrolase; *SLC26A11* = Solute  
288 Carrier Family 26 Member 11; *RNF213* = Ring Finger Protein 213; Mb = megabase.

289

290

291



## 292 **References**

- 293 Ahn, I.M., D.H. Park, H.J. Hann, K.H. Kim, H.J. Kim *et al.*, 2014 Incidence, prevalence, and survival of  
294 moyamoya disease in Korea: a nationwide, population-based study. *Stroke* 45 (4):1090-1095.
- 295 Bang, O.Y., J.W. Chung, J. Cha, M.J. Lee, J.Y. Yeon *et al.*, 2016 A Polymorphism in RNF213 Is a  
296 Susceptibility Gene for Intracranial Atherosclerosis. *PLoS One* 11 (6):e0156607.
- 297 Cheng, Y.C., T.M. Stanne, A.K. Giese, W.K. Ho, M. Traylor *et al.*, 2016 Genome-Wide Association Analysis  
298 of Young-Onset Stroke Identifies a Locus on Chromosome 10q25 Near HAP2. *Stroke* 47 (2):307-  
299 316.
- 300 Gormley, P., V. Anttila, B.S. Winsvold, P. Palta, T. Esko *et al.*, 2016 Meta-analysis of 375,000 individuals  
301 identifies 38 susceptibility loci for migraine. *Nature Genetics* 48 (8):856-866.
- 302 Hitomi, T., T. Habu, H. Kobayashi, H. Okuda, K.H. Harada *et al.*, 2013 Downregulation of Securin by the  
303 variant RNF213 R4810K (rs112735431, G>A) reduces angiogenic activity of induced pluripotent  
304 stem cell-derived vascular endothelial cells from moyamoya patients. *Biochemical and*  
305 *Biophysical Research Communications* 438 (1):13-19.
- 306 Kobayashi, H., M. Brozman, K. Kyselova, D. Vizlayova, T. Morimoto *et al.*, 2016 RNF213 Rare Variants in  
307 Slovakian and Czech Moyamoya Disease Patients. *PLoS One* 11 (10):e0164759.
- 308 Koizumi, A., H. Kobayashi, T. Hitomi, K.H. Harada, T. Habu *et al.*, 2016 A new horizon of moyamoya  
309 disease and associated health risks explored through RNF213. *Environ Health Prev Med* 21  
310 (2):55-70.
- 311 Liu, W., D. Morito, S. Takashima, Y. Mineharu, H. Kobayashi *et al.*, 2011 Identification of RNF213 as a  
312 susceptibility gene for moyamoya disease and its possible role in vascular development. *PLoS*  
313 *One* 6 (7):e22542.
- 314 May, A., and P.J. Goadsby, 1999 The trigeminovascular system in humans: pathophysiologic implications  
315 for primary headache syndromes of the neural influences on the cerebral circulation. *Journal of*  
316 *Cerebral Blood Flow and Metabolism* 19 (2):115-127.
- 317 Miyawaki, S., H. Imai, M. Shimizu, S. Yagi, H. Ono *et al.*, 2013 Genetic variant RNF213 c.14576G>A in  
318 various phenotypes of intracranial major artery stenosis/occlusion. *Stroke* 44 (10):2894-2897.
- 319 Okazaki, S., T. Morimoto, Y. Kamatani, T. Kamimura, H. Kobayashi *et al.*, 2019 Moyamoya Disease  
320 Susceptibility Variant RNF213 p.R4810K Increases the Risk of Ischemic Stroke Attributable to  
321 Large-Artery Atherosclerosis. *Circulation* 139 (2):295-298.
- 322 Rungta, R.L., H.B. Choi, J.R. Tyson, A. Malik, L. Dissing-Olesen *et al.*, 2015 The cellular mechanisms of  
323 neuronal swelling underlying cytotoxic edema. *Cell* 161 (3):610-621.
- 324 Scholz, B., C. Korn, J. Wojtarowicz, C. Mogler, I. Augustin *et al.*, 2016 Endothelial RSPO3 Controls  
325 Vascular Stability and Pruning through Non-canonical WNT/Ca(2+)/NFAT Signaling. *Dev Cell* 36  
326 (1):79-93.
- 327 Sonobe, S., M. Fujimura, K. Niizuma, Y. Nishijima, A. Ito *et al.*, 2014 Temporal profile of the vascular  
328 anatomy evaluated by 9.4-T magnetic resonance angiography and histopathological analysis in  
329 mice lacking RNF213: a susceptibility gene for moyamoya disease. *Brain Research* 1552:64-71.
- 330 Suzuki, J., and A. Takaku, 1969 Cerebrovascular "moyamoya" disease. Disease showing abnormal net-  
331 like vessels in base of brain. *Archives of Neurology* 20 (3):288-299.
- 332 Uchino, K., S.C. Johnston, K.J. Becker, and D.L. Tirschwell, 2005 Moyamoya disease in Washington State  
333 and California. *Neurology* 65 (6):956-958.
- 334 Wakai, K., A. Tamakoshi, K. Ikezaki, M. Fukui, T. Kawamura *et al.*, 1997 Epidemiological features of  
335 moyamoya disease in Japan: findings from a nationwide survey. *Clinical Neurology and*  
336 *Neurosurgery* 99 Suppl 2:S1-5.

337 Zhou, S., A. Ambalavanan, D. Rochefort, P. Xie, C.V. Bourassa *et al.*, 2016 RNF213 Is Associated with  
338 Intracranial Aneurysms in the French-Canadian Population. *Am J Hum Genet* 99 (5):1072-1085.
