# Supplementary material for: RNF213 variation, a broader role in neurovascular disease in Caucasian and Japanese populations
Source: bioRxiv preprint, doi:10.1101/2020.03.31.013078, version 1 (2020-03-31)
Supplement: Supplemental Figure 1 [file 013078_file02.pdf]

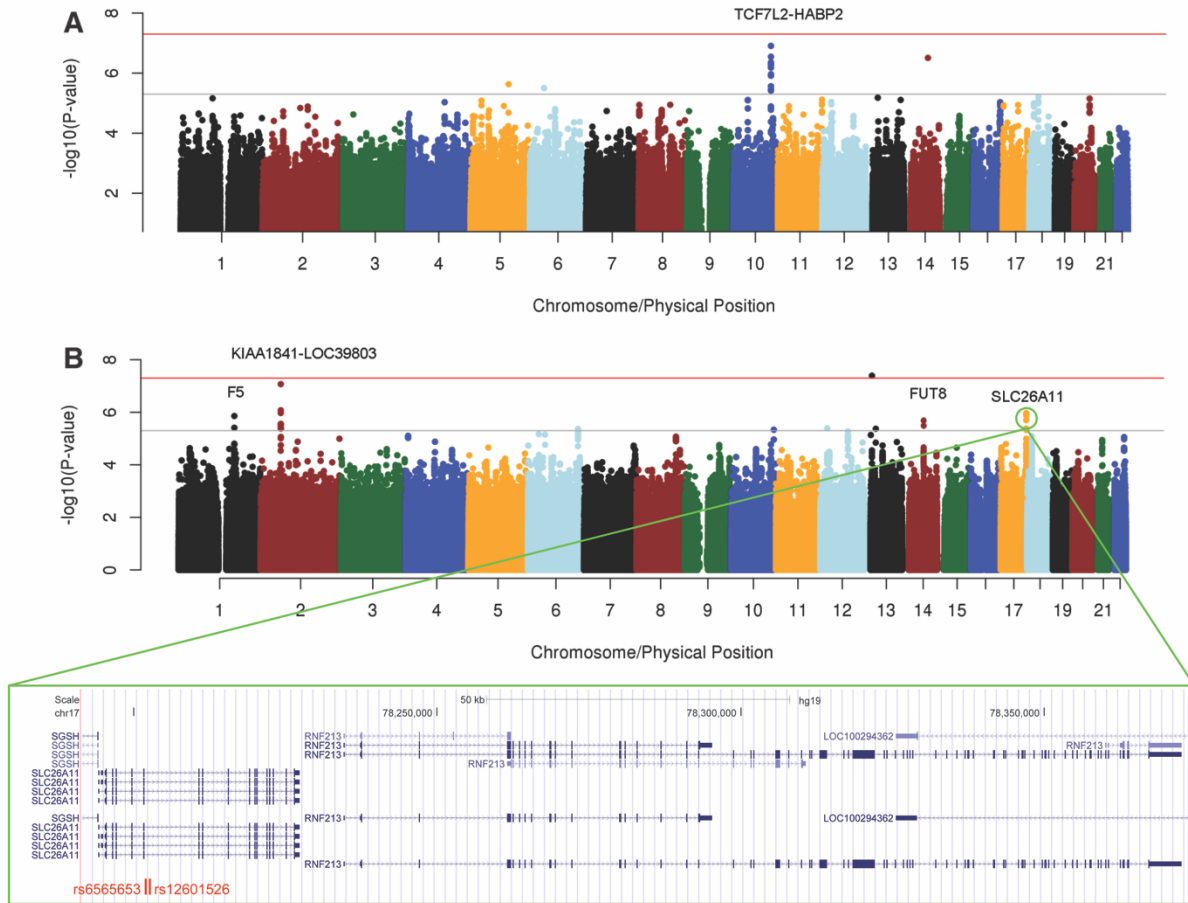

**Figure S1.** Genome-wide association results of early-onset ischemic stroke based on transethnic meta-analysis (A) and European-only meta-analysis (B). Red line:  $P=5 \times 10^{-8}$ ; grey line:  $P=5 \times 10^{-6}$  (from Cheng et al. Stroke 2016; Copyright © American Heart Association, Inc. All rights reserved). *SLC26A11* signal in the European-only meta-analysis on chromosome 17 is highlighted with a green circle and a Genome Browser zoomed in view of the region is given; rs6565653 and rs12601526 are highlighted in red.
