# Supplementary material for: RNF213 variation, a broader role in neurovascular disease in Caucasian and Japanese populations
Source: bioRxiv or medRxiv preprint supplement (doi:10.1101/2020.03.31.013078), 2020-03-31
Supplement: Supplementary file [file media-3.pdf]

### JPT population

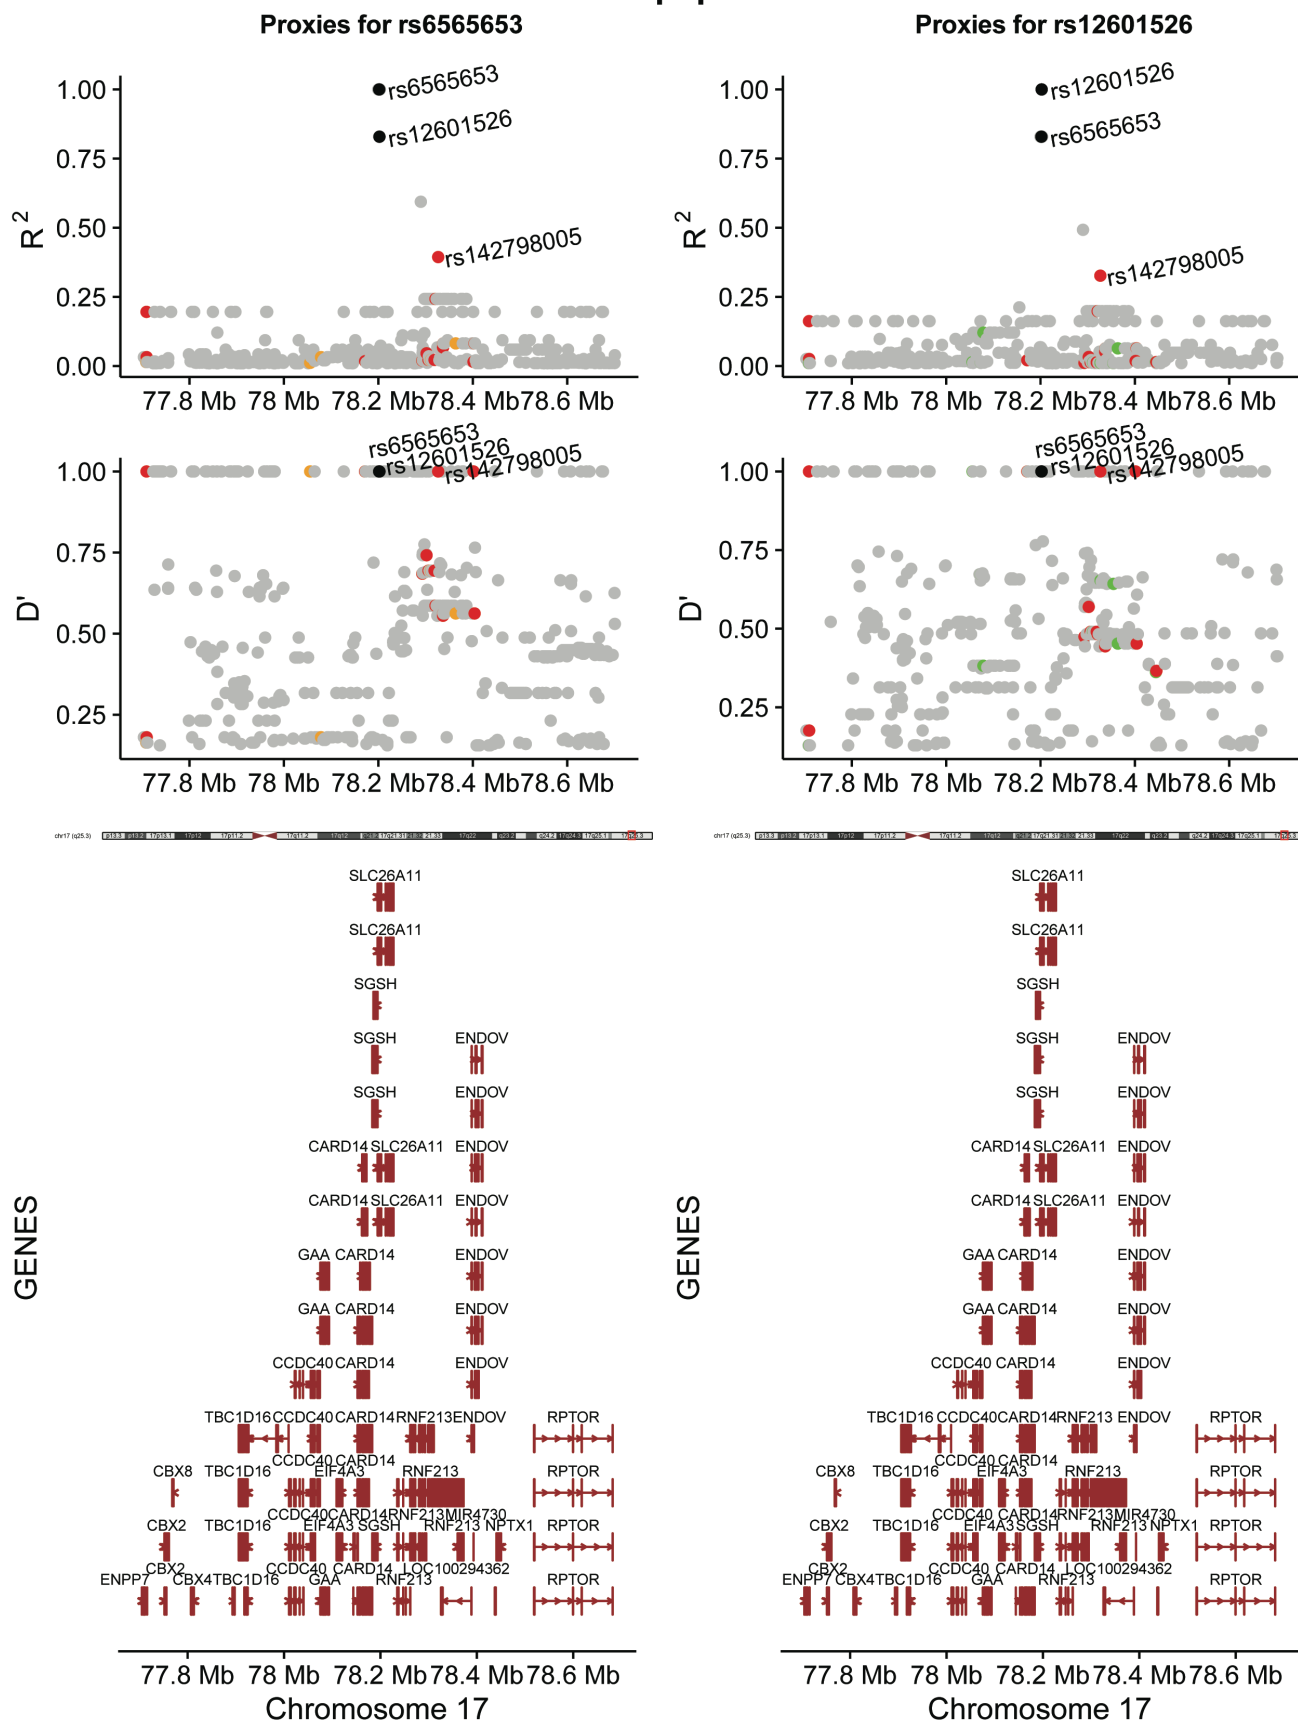

**Figure S3.** R<sup>2</sup> and D' values for proxy SNPs in JPT population for rs6565653 and rs12601526 *SLCA26A11* SNPs. Dot color meaning: red = missense mutation, orange = nonsense mutation, green = synonymous mutation, grey = non-coding-mutation.
