# Supplementary material for: RNF213 variation, a broader role in neurovascular disease in Caucasian and Japanese populations
Source: bioRxiv or medRxiv preprint supplement (doi:10.1101/2020.03.31.013078), 2020-03-31
Supplement: Supplementary file [file media-5.pdf]

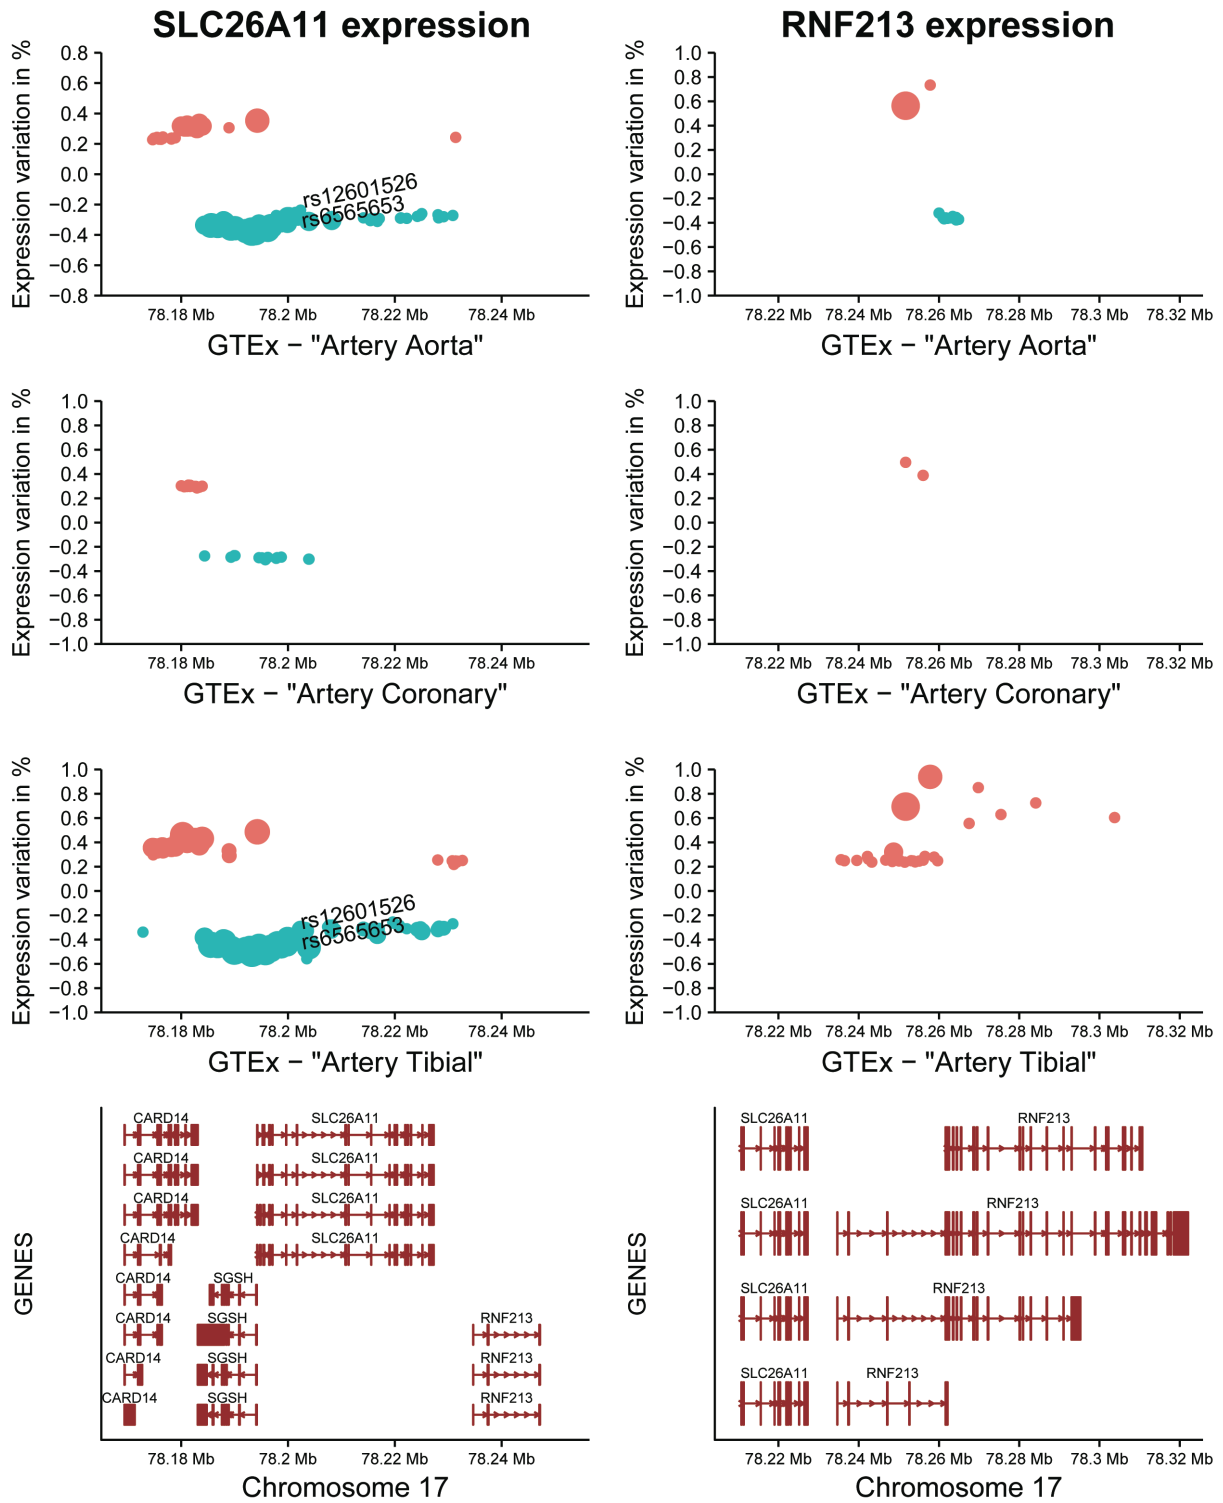

**Figure S5.** Expression changes in *SLC26A11* and *RNF213* due to SNPs effect in arterial tissues. Red dots show overexpression and blue dots show underexpression, respectively, of *SLC26A11* and *RNF213* proteins in aortic, coronary and tibial artery tissues. The size of each dot represents the  $-\log_{10}(p\text{-value})$  between the SNP and the expression change. Figures elaborated with data from the Portal for the Genotype-Tissue Expression project (GTEx). *CARD14* = Caspase Recruitment Domain Family Member 14; *SGSH* = N-Sulfoglucosamine Sulfohydrolase; *SLC26A11* = Solute Carrier Family 26 Member 11; *RNF213* = Ring Finger Protein 213; Mb = megabase.
