# Supplementary material for: RNF213 variation, a broader role in neurovascular disease in Caucasian and Japanese populations
Source: bioRxiv or medRxiv preprint supplement (doi:10.1101/2020.03.31.013078), 2020-03-31
Supplement: Supplementary file [file media-6.pdf]

**Table S1. Chromosome, position and allele frequencies for SNPs used in the LD analysis in CEU population.**

| rsID       | Chr | Position | EUR AF        |
|------------|-----|----------|---------------|
| rs7207000  | 17  | 78192358 | 0.3559        |
| rs6565649  | 17  | 78192414 | 0.3549        |
| rs6565650  | 17  | 78192571 | 0.3569        |
| rs6565651  | 17  | 78193252 | 0.3539        |
| rs4889841  | 17  | 78193831 | 0.3628        |
| rs12946329 | 17  | 78195772 | 0.3161        |
| rs7224212  | 17  | 78199903 | 0.2445        |
| rs6565653  | 17  | 78201783 | 0.4761        |
| rs12601526 | 17  | 78202358 | 0.4284        |
| rs7208687  | 17  | 78206586 | <b>0.3449</b> |
| rs6420487  | 17  | 78207690 | <b>0.2853</b> |
| rs7216577  | 17  | 78208374 | <b>0.2853</b> |
| rs3924207  | 17  | 78210776 | 0.0457        |
| rs11658788 | 17  | 78211732 | <b>0.3449</b> |
| rs6420489  | 17  | 78212206 | 0.4394        |
| rs12942462 | 17  | 78215566 | 0.2266        |
| rs12949090 | 17  | 78217097 | 0.2276        |
| rs7406843  | 17  | 78219065 | 0.5765        |
| rs9904116  | 17  | 78222661 | 0.673         |
| rs8064518  | 17  | 78223103 | 0.7167        |
| rs8076666  | 17  | 78223817 | 0.8638        |
| rs12938473 | 17  | 78224232 | 0.3111        |
| rs8078855  | 17  | 78225055 | 0.3241        |
| rs11650413 | 17  | 78228181 | 0.4304        |
| rs9915508  | 17  | 78230756 | 0.495         |
| rs9903254  | 17  | 78232650 | 0.4264        |
| rs7217421  | 17  | 78235460 | 0.5139        |
| rs4889968  | 17  | 78236804 | 0.0288        |
| rs9916351  | 17  | 78239532 | 0.4533        |
| rs12603583 | 17  | 78244237 | 0.0258        |
| rs9902013  | 17  | 78246462 | 0.0447        |
| rs12947578 | 17  | 78246734 | 0.4066        |
| rs9890007  | 17  | 78251427 | <b>0.4602</b> |
| rs9901491  | 17  | 78251518 | <b>0.0249</b> |
| rs7219131  | 17  | 78252770 | <b>0.4602</b> |
| rs8069705  | 17  | 78254067 | 0.4404        |
| rs12601730 | 17  | 78255597 | <b>0.0249</b> |
| rs12601017 | 17  | 78256912 | <b>0.0249</b> |
| rs7214614  | 17  | 78258794 | 0.4165        |
| rs11869363 | 17  | 78266759 | 0.2893        |
| rs12937242 | 17  | 78268294 | <b>0.1531</b> |
| rs9909720  | 17  | 78269111 | <b>0.1531</b> |
| rs9905727  | 17  | 78272814 | 0.164         |
| rs8068939  | 17  | 78275265 | 0.2614        |
| rs8076804  | 17  | 78275482 | 0.162         |
| rs12451223 | 17  | 78279334 | <b>0.2157</b> |

| rsID       | Chr | Position | EUR AF        |
|------------|-----|----------|---------------|
| rs8066993  | 17  | 78280030 | <b>0.2157</b> |
| rs8081176  | 17  | 78283987 | 0.3151        |
| rs9674807  | 17  | 78286177 | 0.2883        |
| rs7501761  | 17  | 78290185 | 0.671         |
| rs6565666  | 17  | 78292945 | 0.1879        |
| rs7222014  | 17  | 78293469 | 0.499         |
| rs7225029  | 17  | 78297779 | 0.0666        |
| rs4889843  | 17  | 78299319 | 0.5           |
| rs4889844  | 17  | 78299497 | 0.7266        |
| rs7501563  | 17  | 78300546 | <b>0.7048</b> |
| rs9913473  | 17  | 78300821 | <b>0.7048</b> |
| rs4075499  | 17  | 78300859 | <b>0.7048</b> |
| rs9907978  | 17  | 78301380 | <b>0.7058</b> |
| rs9908583  | 17  | 78301474 | <b>0.7058</b> |
| rs8082521  | 17  | 78302157 | <b>0.7058</b> |
| rs4890007  | 17  | 78304552 | <b>0.0348</b> |
| rs4890008  | 17  | 78305619 | <b>0.0348</b> |
| rs10782008 | 17  | 78305871 | <b>0.67</b>   |
| rs8074015  | 17  | 78306280 | 0.7028        |
| rs8072917  | 17  | 78309108 | 0.667         |
| rs7211876  | 17  | 78311360 | 0.2147        |
| rs4890009  | 17  | 78311508 | 0.7018        |
| rs34399489 | 17  | 78313562 | 0.0179        |
| rs4890010  | 17  | 78316179 | <b>0.67</b>   |
| rs11150856 | 17  | 78322882 | <b>0.1531</b> |
| rs9899221  | 17  | 78323500 | 0.0189        |
| rs12051723 | 17  | 78324259 | 0.161         |
| rs11655038 | 17  | 78327229 | 0.0885        |
| rs7216493  | 17  | 78327358 | 0.7346        |
| rs11656211 | 17  | 78327745 | 0.0964        |
| rs8067292  | 17  | 78333840 | <b>0.5984</b> |
| rs4078429  | 17  | 78335372 | 0.0437        |
| rs7221291  | 17  | 78344343 | <b>0.5984</b> |
| rs8070106  | 17  | 78344446 | <b>0.5984</b> |
| rs4889847  | 17  | 78346548 | 0.0487        |
| rs6565681  | 17  | 78348494 | 0.84          |
| rs9898470  | 17  | 78351368 | 0.0417        |
| rs4889848  | 17  | 78354661 | 0.8419        |
| rs7224239  | 17  | 78355176 | 0.4334        |
| rs12944088 | 17  | 78357478 | 0.0159        |
| rs4890018  | 17  | 78360001 | 0.0646        |
| rs7223701  | 17  | 78362651 | 0.0915        |
| rs8072774  | 17  | 78363054 | <b>0.0905</b> |
| rs3185057  | 17  | 78363847 | <b>0.0905</b> |
| rs8359     | 17  | 78368051 | 0.0944        |
| rs13341671 | 17  | 78374412 | 0.5676        |

SNPs with at least another variant with the same allele frequency are highlighted in red. EUR AF = European allele frequency
