# Supplementary material for: RNF213 variation, a broader role in neurovascular disease in Caucasian and Japanese populations
Source: bioRxiv or medRxiv preprint supplement (doi:10.1101/2020.03.31.013078), 2020-03-31
Supplement: Supplementary file [file media-7.pdf]

**Table S2. Chromosome, position and allele frequencies for the SNPs used in the LD analysis in the JPT population.**

| rsID       | Chr | Position | JPT AF        |
|------------|-----|----------|---------------|
| rs7207000  | 17  | 78192358 | <b>0.3998</b> |
| rs6565649  | 17  | 78192414 | <b>0.3998</b> |
| rs6565650  | 17  | 78192571 | <b>0.3998</b> |
| rs6565651  | 17  | 78193252 | 0.4028        |
| rs4889841  | 17  | 78193831 | 0.4008        |
| rs12946329 | 17  | 78195772 | 0.3929        |
| rs7224212  | 17  | 78199903 | <b>0.38</b>   |
| rs6565653  | 17  | 78201783 | 0.9752        |
| rs12601526 | 17  | 78202358 | 0.9712        |
| rs7208687  | 17  | 78206586 | 0.6022        |
| rs6420487  | 17  | 78207690 | <b>0.3472</b> |
| rs7216577  | 17  | 78208374 | <b>0.3472</b> |
| rs11658788 | 17  | 78211732 | 0.6002        |
| rs6420489  | 17  | 78212206 | 0.621         |
| rs8079641  | 17  | 78212420 | 0.0377        |
| rs12942462 | 17  | 78215566 | 0.3462        |
| rs12949090 | 17  | 78217097 | 0.3452        |
| rs7406843  | 17  | 78219065 | 0.9464        |
| rs9904116  | 17  | 78222661 | 0.9454        |
| rs8064518  | 17  | 78223103 | 0.994         |
| rs8076666  | 17  | 78223817 | 0.999         |
| rs12938473 | 17  | 78224232 | <b>0.6161</b> |
| rs8078855  | 17  | 78225055 | 0.5615        |
| rs11650413 | 17  | 78228181 | 0.4236        |
| rs9915508  | 17  | 78230756 | 0.4196        |
| rs9903254  | 17  | 78232650 | 0.1627        |
| rs7217421  | 17  | 78235460 | <b>0.6161</b> |
| rs4889968  | 17  | 78236804 | 0.2024        |
| rs9916351  | 17  | 78239532 | 0.6171        |
| rs12603583 | 17  | 78244237 | 0.1994        |
| rs9902013  | 17  | 78246462 | 0.3294        |
| rs12947578 | 17  | 78246734 | 0.3115        |
| rs9890007  | 17  | 78251427 | 0.6359        |
| rs9901491  | 17  | 78251518 | 0.2163        |
| rs7219131  | 17  | 78252770 | 0.6349        |
| rs8069705  | 17  | 78254067 | 0.505         |
| rs12601730 | 17  | 78255597 | <b>0.2034</b> |
| rs12601017 | 17  | 78256912 | <b>0.2034</b> |
| rs7214614  | 17  | 78258794 | <b>0.3006</b> |
| rs11869363 | 17  | 78266759 | 0.4851        |

| rsID       | Chr | Position | JPT AF        |
|------------|-----|----------|---------------|
| rs12937242 | 17  | 78268294 | <b>0.0704</b> |
| rs9909720  | 17  | 78269111 | <b>0.0704</b> |
| rs9905727  | 17  | 78272814 | 0.0764        |
| rs8068939  | 17  | 78275265 | 0.0923        |
| rs8076804  | 17  | 78275482 | 0.0774        |
| rs12451223 | 17  | 78279334 | 0.3075        |
| rs8066993  | 17  | 78280030 | <b>0.3006</b> |
| rs8081176  | 17  | 78283987 | 0.3244        |
| rs9674807  | 17  | 78286177 | 0.3046        |
| rs7501761  | 17  | 78290185 | 0.6339        |
| rs6565666  | 17  | 78292945 | 0.1468        |
| rs7222014  | 17  | 78293469 | 0.2192        |
| rs4889843  | 17  | 78299319 | 0.1944        |
| rs4889844  | 17  | 78299497 | <b>0.3948</b> |
| rs7501563  | 17  | 78300546 | <b>0.2341</b> |
| rs9913473  | 17  | 78300821 | <b>0.2341</b> |
| rs4075499  | 17  | 78300859 | <b>0.2341</b> |
| rs9907978  | 17  | 78301380 | <b>0.2341</b> |
| rs9908583  | 17  | 78301474 | 0.2351        |
| rs8082521  | 17  | 78302157 | 0.2262        |
| rs10782008 | 17  | 78305871 | 0.3879        |
| rs8074015  | 17  | 78306280 | <b>0.3948</b> |
| rs8072917  | 17  | 78309108 | 0.3661        |
| rs7211876  | 17  | 78311360 | 0.3214        |
| rs4890009  | 17  | 78311508 | 0.375         |
| rs4890010  | 17  | 78316179 | <b>0.38</b>   |
| rs11150856 | 17  | 78322882 | 0.0317        |
| rs12051723 | 17  | 78324259 | 0.248         |
| rs7216493  | 17  | 78327358 | 0.5486        |
| rs8067292  | 17  | 78333840 | 0.3423        |
| rs4078429  | 17  | 78335372 | 0.1736        |
| rs7221291  | 17  | 78344343 | 0.3869        |
| rs8070106  | 17  | 78344446 | 0.3849        |
| rs6565681  | 17  | 78348494 | 0.5972        |
| rs9898470  | 17  | 78351368 | 0.1766        |
| rs4889848  | 17  | 78354661 | 0.5794        |
| rs7224239  | 17  | 78355176 | 0.4077        |
| rs4890018  | 17  | 78360001 | 0.0288        |
| rs3185057  | 17  | 78363847 | 0.0367        |
| rs13341671 | 17  | 78374412 | 0.3819        |

SNPs with at least another variant with the same allele frequency are highlighted in red. EAS AF = East Asian allele frequency
